# Supplementary material for: Feasibility of nanoparticle-enhanced LIBS (NELIBS) for the analysis of archaeological metallic artifacts: a critical assessment
Source: Royal Society of Chemistry journal article supplement (doi:10.1039/d4ja00349g), 2024-11-26
Supplement: d4ja00349g1.pdf [file d4ja00349g1.pdf]

## Electronic supplementary information

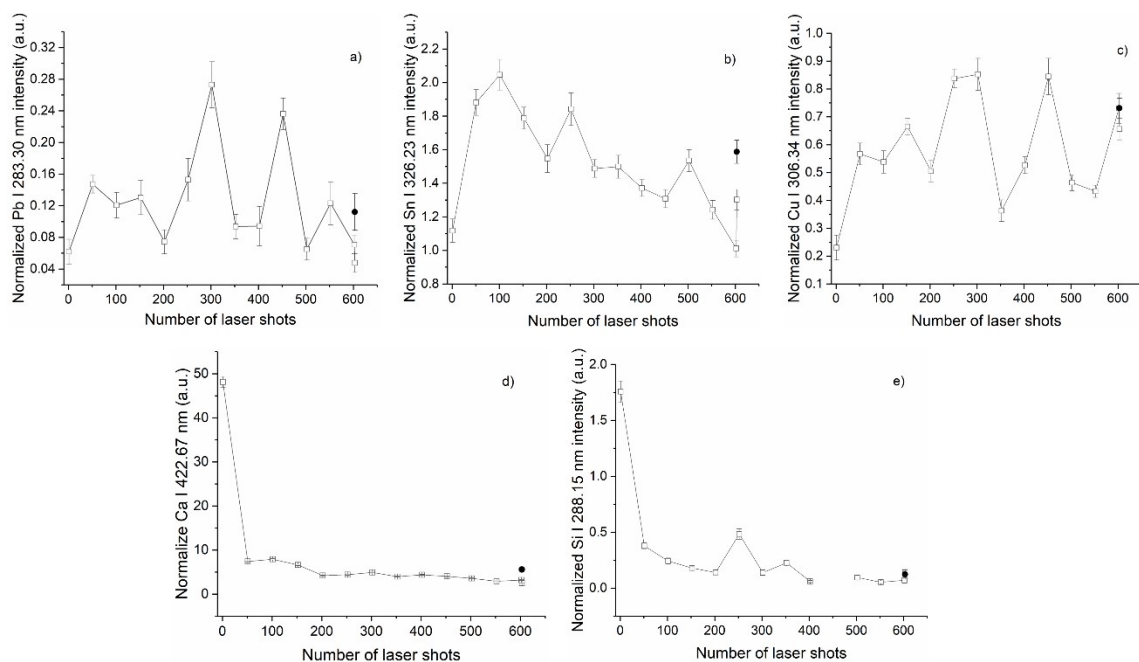

**Figure S1 a-e):** Depth profiles of normalized LIBS (white squares) and NELIBS (black circles) emission intensity of Pb, Sn, Cu, Ca, and Si in spot C.

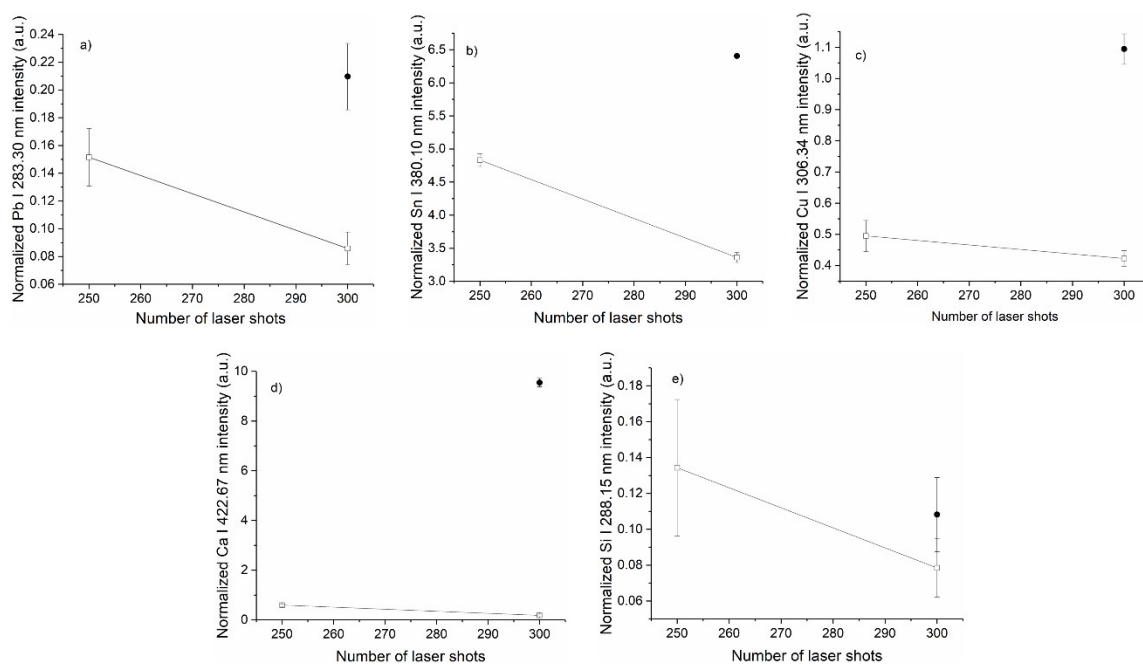

**Figure S2 a-e):** Depth profiles of normalized LIBS (white squares) and NELIBS (black circles) emission intensity of Pb, Sn, Cu, Ca, and Si in spot D.
